# Supplementary material
Source: MDPI journal article supplement (https://www.mdpi.com/2073-4395/10/1/21)
Supplement: s1 [file s1]

Archive with 4 entries (4 files):
- Figure S1.pdf
- Supplementary material Table S1.xlsx
- Supplementary material Table S2.xlsx
- Supplementary material Table S3.xlsx
