# Supplementary material
Source: MDPI journal article supplement (https://www.mdpi.com/2073-4395/10/1/21)
Supplement: s1 [file s1 › Figure S1.pdf]

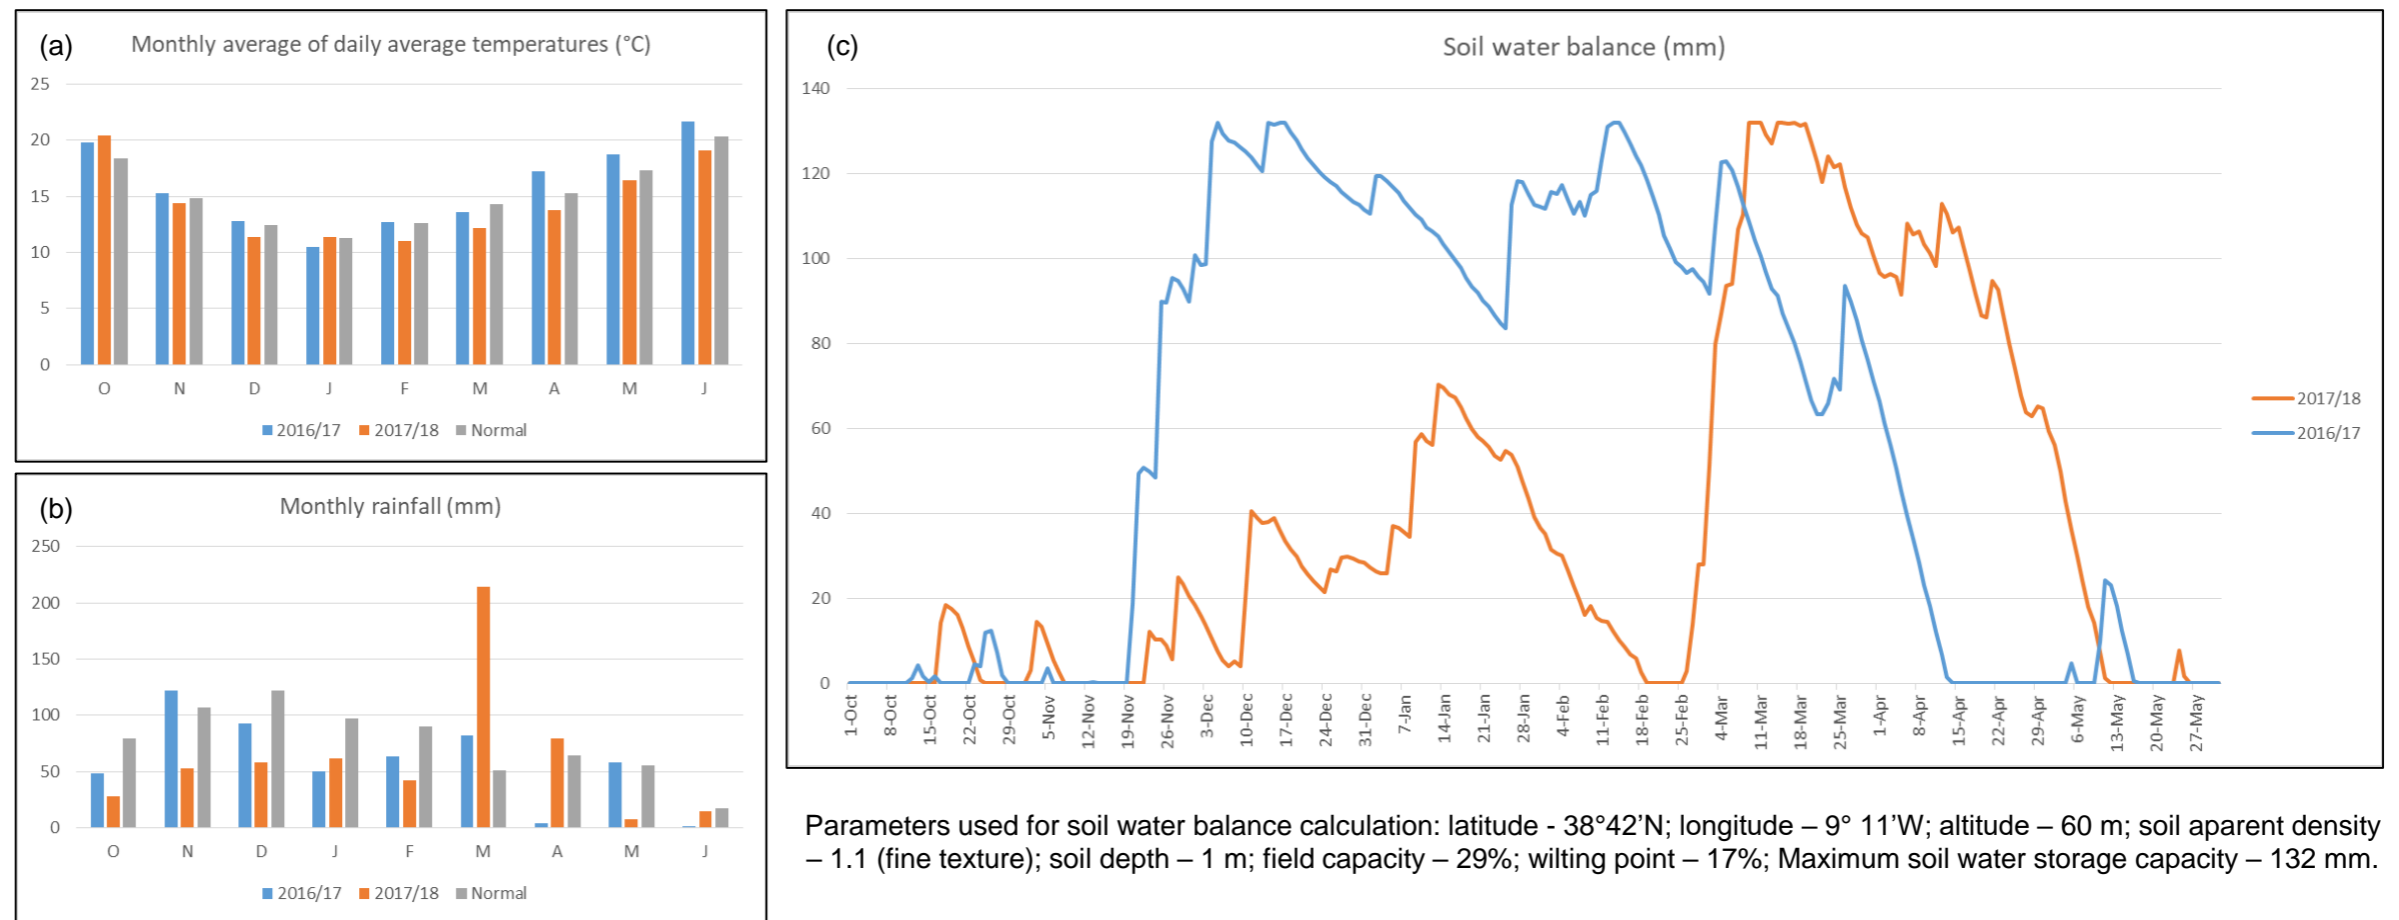

**Figure S1.** Meteorological data collected at Tapada da Ajuda (Lisbon) during 2016/17 and 2017/18: (a) montly average of daily average temperatures compared to the 30-years climatological normal values for Lisbon; (b) monthly rainfall compared to the 30-years climatological normal values for Lisbon; (c) soil water balance.
