# Supplementary material
Source: MDPI journal article supplement (https://www.mdpi.com/2073-4395/10/1/21)
Supplement: s1 [file s1 › Supplementary material Table S1.xlsx]

## Sheet: TableS1
Table S1: Difference analysis of morphological traits by Kruskal Wallis test
Traits	Year 2016/17			Year 2017/18
	Df	Chi-square	p value	Df	Chi-square	p value
DUF	22	225.14	0	25	153.96	0
NLMS	22	302.38	0	25	233.82	0
HUFF	22	272.52	0	25	273.31	0
ADNL	22	165.35	0	25	226.97	0
NPMS	22	100.31	0	25	145.46	0
PLMS	22	83.328	0	25	240.08	0
PWMS	22	184.66	0	25	280.63	0
RBLWPMS	22	50.558	0	25	183.68	0
NSMS	22	123.62	0	25	142.21	0
SLMS	22	218.78	0	25	406.77	0
SWMS	22	188.32	0	25	408.85	0
RBLWSMS	22	95.471	0	25	217.52	0
NSPMS	22	49.082	0	25	152.75	0
TSWMS	22	621.88	0	25	424.8	0
WSMS	22	156.3	0	25	281.45	0
NPB	22	125.16	0	25	122.37	0
SLPB	22	171.12	0	25	145.18	0
ADBPB	22	122.99	0	25	107.2	0
ALPB	22	169.18	0	25	200.97	0
PBL	22	123.95	0	25	98.947	0
NPPB	22	92.595	0	25	165.6	0
NSPB	22	91.62	0	25	195.37	0
NPPPB	22	94.584	0	25	140.5	0
NSPPB	22	65.718	0	25	148.57	0
WSPB	22	120.59	0	25	260.34	0
TSWPB	22	527	0	25	351.72	0
WSPPB	22	227.51	0	25	264.13	0
TNP	22	128.75	0	25	235.85	0
TNS	22	137.75	0	25	256.1	0
TNSPP	22	63.459	0	25	175.14	0
TW	22	202.06	0	25	363.37	0
SWBLR	22	231	0	25	230.52	0
PSMS	22	153.71	0	25	258.96	0
PSPB	22	153.71	0	25	126.07	0
TBL	22	198.88	0	25	163.04	0
TTSW	22	408.54	0	25	461.3	0
