# Supplementary material
Source: MDPI journal article supplement (https://www.mdpi.com/2073-4395/10/1/21)
Supplement: s1 [file s1 › Supplementary material Table S2.xlsx]

## Sheet: Folha1
Table S2: Correlation matrix between morphological traits calculated for the 23 Lupinus mutabilis accessions under study in 2016/17
	DUF	NLMS	HUFF	ADNL	SLPB	TBL	NPB	ADBPB	ALPB	PBL	TNP	NPMS	NPPB	PLMS	PWMS	RBLWPMS	SLMS	SWMS	RBLWSMS	NSMS	WSMS	TSWMS	NSPMS	NSPB	WSPB	TWSPB	NSPPB	NPPPB	TNS	TNSPP	TW	PSMS	PSPB	SWBLR	TTSW
DUF	1	0.41	0.1	-0.28	0.23	0.15	0.1	-0.06	0.49	-0.19	-0.15	-0.21	-0.05	0.29	0.45	-0.29	0.31	0.25	-0.17	-0.28	-0.09	0.23	-0.47	-0.07	0.1	0.24	-0.23	-0.2	-0.25	-0.3	0.02	-0.05	0.05	-0.15	0.16
NLMS	0.41	1	0.67	-0.01	0.35	0.42	0.38	0.34	0.43	-0.37	-0.11	-0.44	0.08	0.36	0.54	-0.35	0.41	0.53	-0.14	-0.36	-0.07	0.57	-0.19	0.06	0.24	0.38	0.03	-0.15	-0.11	-0.17	0.14	-0.28	0.28	-0.2	0.34
HUFF	0.1	0.67	1	0.68	0.38	0.6	0.36	0.48	0.47	-0.06	0.24	-0.18	0.3	0.43	0.55	-0.15	0.47	0.37	0.16	-0.13	0.23	0.54	-0.14	0.12	0.38	0.41	-0.17	0.18	0.17	-0.27	0.35	-0.47	0.47	-0.04	0.36
ADNL	-0.28	-0.01	0.68	1	0.17	0.4	0.14	0.45	0.15	0.21	0.5	0.18	0.45	0.15	0.16	0.05	0.16	-0.11	0.42	0.18	0.32	0.18	0.02	0.21	0.3	0.13	-0.24	0.53	0.44	-0.21	0.33	-0.39	0.39	0.12	0.07
SLPB	0.23	0.35	0.38	0.17	1	0.94	0.94	-0.44	0.61	0.58	0.41	-0.17	0.54	0.08	0.43	-0.41	0.24	0.44	-0.3	-0.1	0.09	0.28	0.06	0.42	0.69	0.38	-0.24	0.27	0.37	-0.22	0.6	-0.68	0.68	-0.02	0.23
TBL	0.15	0.42	0.6	0.4	0.94	1	0.9	-0.19	0.6	0.5	0.43	-0.15	0.58	0.19	0.51	-0.38	0.34	0.5	-0.25	-0.06	0.23	0.39	0.08	0.44	0.75	0.45	-0.23	0.33	0.39	-0.19	0.69	-0.74	0.74	0.07	0.31
NPB	0.1	0.38	0.36	0.14	0.94	0.9	1	-0.44	0.38	0.6	0.42	-0.23	0.57	-0.03	0.43	-0.53	0.21	0.49	-0.35	-0.19	0.03	0.3	0.01	0.48	0.71	0.3	-0.13	0.28	0.38	-0.24	0.6	-0.74	0.74	-0.01	0.16
ADBPB	-0.06	0.34	0.48	0.45	-0.44	-0.19	-0.44	1	0.01	-0.7	-0.19	0.07	-0.08	0.25	0	0.16	0.07	-0.14	0.33	0.09	0.06	0.18	0	-0.13	-0.2	0.11	-0.04	0.05	-0.14	0.04	-0.21	0.24	-0.24	-0.08	0.15
ALPB	0.49	0.43	0.47	0.15	0.61	0.6	0.38	0.01	1	0.1	0.01	-0.13	0.13	0.48	0.52	-0.08	0.46	0.37	-0.1	-0.06	0.16	0.38	0.12	-0.02	0.36	0.63	-0.36	-0.08	-0.03	-0.1	0.31	-0.23	0.23	-0.08	0.48
PBL	-0.19	-0.37	-0.06	0.21	0.58	0.5	0.6	-0.7	0.1	1	0.54	0.19	0.47	-0.35	0.03	-0.24	-0.11	0.01	-0.2	0.1	0.16	-0.11	0.11	0.34	0.45	-0.01	-0.08	0.3	0.47	-0.11	0.47	-0.48	0.48	0.18	-0.1
TNP	-0.15	-0.11	0.24	0.5	0.41	0.43	0.42	-0.19	0.01	0.54	1	0.27	0.8	-0.16	0.16	-0.21	0.03	-0.06	0.3	0.2	0.2	0.13	0.09	0.68	0.64	0	0.02	0.83	0.89	-0.09	0.57	-0.72	0.72	0.33	-0.13
NPMS	-0.21	-0.44	-0.18	0.18	-0.17	-0.15	-0.23	0.07	-0.13	0.19	0.27	1	0.16	-0.05	-0.29	0.41	-0.22	-0.29	0.07	0.88	0.55	-0.19	0.13	0.05	-0.01	-0.06	-0.14	0.28	0.3	0.26	0.21	0.18	-0.18	0.49	0.16
NPPB	-0.05	0.08	0.3	0.45	0.54	0.58	0.57	-0.08	0.13	0.47	0.8	0.16	1	-0.18	0.13	-0.23	-0.03	0.02	0.17	0.24	0.25	0.2	0.14	0.88	0.78	0.08	-0.1	0.85	0.88	-0.02	0.65	-0.77	0.77	0.38	-0.01
PLMS	0.29	0.36	0.43	0.15	0.08	0.19	-0.03	0.25	0.48	-0.35	-0.16	-0.05	-0.18	1	0.58	0.4	0.75	0.48	0.26	0.1	0.46	0.55	0.1	-0.15	0.22	0.59	-0.22	-0.07	-0.13	0.06	0.32	-0.12	0.12	0.26	0.62
PWMS	0.45	0.54	0.55	0.16	0.43	0.51	0.43	0	0.52	0.03	0.16	-0.29	0.13	0.58	1	-0.4	0.87	0.81	-0.09	-0.36	0.12	0.62	-0.24	0.03	0.41	0.52	-0.24	-0.02	-0.01	-0.35	0.34	-0.43	0.43	0.02	0.38
RBLWPMS	-0.29	-0.35	-0.15	0.05	-0.41	-0.38	-0.53	0.16	-0.08	-0.24	-0.21	0.41	-0.23	0.4	-0.4	1	-0.05	-0.3	0.4	0.66	0.5	-0.02	0.35	-0.14	-0.17	0.05	-0.01	0.02	0.03	0.45	0.05	0.29	-0.29	0.43	0.26
SLMS	0.31	0.41	0.47	0.16	0.24	0.34	0.21	0.07	0.46	-0.11	0.03	-0.22	-0.03	0.75	0.87	-0.05	1	0.75	0.1	-0.22	0.26	0.64	-0.12	-0.08	0.32	0.6	-0.16	-0.1	-0.09	-0.24	0.32	-0.34	0.34	0.16	0.51
SWMS	0.25	0.53	0.37	-0.11	0.44	0.5	0.49	-0.14	0.37	0.01	-0.06	-0.29	0.02	0.48	0.81	-0.3	0.75	1	-0.41	-0.25	0.19	0.49	-0.16	-0.01	0.35	0.45	-0.1	-0.18	-0.11	-0.18	0.34	-0.3	0.3	0.13	0.41
RBLWSMS	-0.17	-0.14	0.16	0.42	-0.3	-0.25	-0.35	0.33	-0.1	-0.2	0.3	0.07	0.17	0.26	-0.09	0.4	0.1	-0.41	1	0.12	0.07	0.07	0.14	0.19	0.02	0.04	-0.16	0.36	0.3	-0.01	-0.04	-0.13	0.13	0.12	0
NSMS	-0.28	-0.36	-0.13	0.18	-0.1	-0.06	-0.19	0.09	-0.06	0.1	0.2	0.88	0.24	0.1	-0.36	0.66	-0.22	-0.25	0.12	1	0.67	-0.11	0.38	0.19	0.1	-0.03	-0.1	0.38	0.41	0.47	0.34	0.11	-0.11	0.62	0.23
WSMS	-0.09	-0.07	0.23	0.32	0.09	0.23	0.03	0.06	0.16	0.16	0.2	0.55	0.25	0.46	0.12	0.5	0.26	0.19	0.07	0.67	1	0.48	0.23	0.09	0.42	0.48	-0.21	0.34	0.33	0.24	0.7	-0.24	0.24	0.88	0.7
TSWMS	0.23	0.57	0.54	0.18	0.28	0.39	0.3	0.18	0.38	-0.11	0.13	-0.19	0.2	0.55	0.62	-0.02	0.64	0.49	0.07	-0.11	0.48	1	-0.04	0.09	0.53	0.8	-0.12	0.13	0.11	-0.14	0.59	-0.52	0.52	0.4	0.75
NSPMS	-0.47	-0.19	-0.14	0.02	0.06	0.08	0.01	0	0.12	0.11	0.09	0.13	0.14	0.1	-0.24	0.35	-0.12	-0.16	0.14	0.38	0.23	-0.04	1	0.32	0.24	0.08	0.28	0.24	0.35	0.77	0.25	-0.07	0.07	0.29	0.08
NSPB	-0.07	0.06	0.12	0.21	0.42	0.44	0.48	-0.13	-0.02	0.34	0.68	0.05	0.88	-0.15	0.03	-0.14	-0.08	-0.01	0.19	0.19	0.09	0.09	0.32	1	0.76	-0.05	0.18	0.77	0.86	0.25	0.57	-0.74	0.74	0.34	-0.16
WSPB	0.1	0.24	0.38	0.3	0.69	0.75	0.71	-0.2	0.36	0.45	0.64	-0.01	0.78	0.22	0.41	-0.17	0.32	0.35	0.02	0.1	0.42	0.53	0.24	0.76	1	0.51	0	0.65	0.7	0.06	0.91	-0.92	0.92	0.52	0.37
TWSPB	0.24	0.38	0.41	0.13	0.38	0.45	0.3	0.11	0.63	-0.01	0	-0.06	0.08	0.59	0.52	0.05	0.6	0.45	0.04	-0.03	0.48	0.8	0.08	-0.05	0.51	1	-0.34	0	-0.04	-0.14	0.56	-0.37	0.37	0.36	0.9
NSPPB	-0.23	0.03	-0.17	-0.24	-0.24	-0.23	-0.13	-0.04	-0.36	-0.08	0.02	-0.14	-0.1	-0.22	-0.24	-0.01	-0.16	-0.1	-0.16	-0.1	-0.21	-0.12	0.28	0.18	0	-0.34	1	-0.08	0.15	0.54	-0.02	-0.07	0.07	0.02	-0.38
NPPPB	-0.2	-0.15	0.18	0.53	0.27	0.33	0.28	0.05	-0.08	0.3	0.83	0.28	0.85	-0.07	-0.02	0.02	-0.1	-0.18	0.36	0.38	0.34	0.13	0.24	0.77	0.65	0	-0.08	1	0.88	0.03	0.59	-0.62	0.62	0.49	-0.04
TNS	-0.25	-0.11	0.17	0.44	0.37	0.39	0.38	-0.14	-0.03	0.47	0.89	0.3	0.88	-0.13	-0.01	0.03	-0.09	-0.11	0.3	0.41	0.33	0.11	0.35	0.86	0.7	-0.04	0.15	0.88	1	0.25	0.65	-0.7	0.7	0.5	-0.12
TNSPP	-0.3	-0.17	-0.27	-0.21	-0.22	-0.19	-0.24	0.04	-0.1	-0.11	-0.09	0.26	-0.02	0.06	-0.35	0.45	-0.24	-0.18	-0.01	0.47	0.24	-0.14	0.77	0.25	0.06	-0.14	0.54	0.03	0.25	1	0.11	0.11	-0.11	0.34	-0.05
TW	0.02	0.14	0.35	0.33	0.6	0.69	0.6	-0.21	0.31	0.47	0.57	0.21	0.65	0.32	0.34	0.05	0.32	0.34	-0.04	0.34	0.7	0.59	0.25	0.57	0.91	0.56	-0.02	0.59	0.65	0.11	1	-0.8	0.8	0.72	0.53
PSMS	-0.05	-0.28	-0.47	-0.39	-0.68	-0.74	-0.74	0.24	-0.23	-0.48	-0.72	0.18	-0.77	-0.12	-0.43	0.29	-0.34	-0.3	-0.13	0.11	-0.24	-0.52	-0.07	-0.74	-0.92	-0.37	-0.07	-0.62	-0.7	0.11	-0.8	1	-1	-0.33	-0.19
PSPB	0.05	0.28	0.47	0.39	0.68	0.74	0.74	-0.24	0.23	0.48	0.72	-0.18	0.77	0.12	0.43	-0.29	0.34	0.3	0.13	-0.11	0.24	0.52	0.07	0.74	0.92	0.37	0.07	0.62	0.7	-0.11	0.8	-1	1	0.33	0.19
SWBLR	-0.15	-0.2	-0.04	0.12	-0.02	0.07	-0.01	-0.08	-0.08	0.18	0.33	0.49	0.38	0.26	0.02	0.43	0.16	0.13	0.12	0.62	0.88	0.4	0.29	0.34	0.52	0.36	0.02	0.49	0.5	0.34	0.72	-0.33	0.33	1	0.52
TTSW	0.16	0.34	0.36	0.07	0.23	0.31	0.16	0.15	0.48	-0.1	-0.13	0.16	-0.01	0.62	0.38	0.26	0.51	0.41	0	0.23	0.7	0.75	0.08	-0.16	0.37	0.9	-0.38	-0.04	-0.12	-0.05	0.53	-0.19	0.19	0.52	1
	Note: Variables with correlation above 0.85 were considered redundant and thus, one of them was excluded for multivariate analysis
