# Supplementary material
Source: MDPI journal article supplement (https://www.mdpi.com/2073-4395/10/1/21)
Supplement: s1 [file s1 › Supplementary material Table S3.xlsx]

## Sheet: Folha1
Table S3: Correlation matrix between morphological traits calculated for the 23 Lupinus mutabilis accessions under study in 2017/18
	DUF	NLMS	HUFF	ADNL	NPMS	PLMS	PWMS	RBLWPMS	NSMS	SLMS	SWMS	RBLWSMS	NSPMS	WSMS	TSWMS	NPB	SLPB	ADBPB	ALPB	PBL	NPPB	NSPB	NPPPB	NSPPB	SWPB	TSWPB	WSPPB	TNP	TNS	TNSPP	TW	SWBLR	PSMS	PSPB	TBL	TTSW
DUF	1	0.07	0.17	-0.14	0.2	0.03	-0.07	0.03	0.1	-0.11	-0.31	0.12	-0.19	-0.05	-0.21	-0.19	-0.1	0.61	0.51	-0.39	-0.39	-0.36	-0.45	-0.22	-0.37	0.25	0.44	-0.25	-0.3	-0.15	-0.33	-0.17	0.53	-0.53	-0.09	-0.01
NLMS	0.07	1	0.77	-0.2	0.34	0.5	0.41	0.29	0.22	0.27	0.37	-0.57	-0.27	0.37	0.39	0.41	0.1	0.37	0	-0.05	-0.27	-0.25	-0.41	-0.29	0	0.41	0.39	-0.15	-0.15	-0.23	0.15	-0.01	0.08	-0.08	0.25	0.24
HUFF	0.17	0.77	1	-0.68	0.41	0.44	0.67	-0.11	0.1	0.44	0.5	-0.27	-0.45	0.44	0.61	0.49	0.42	0.43	0.32	0.15	-0.01	-0.03	-0.15	0.02	0.22	0.61	0.58	0.1	0.01	-0.45	0.35	0.09	-0.1	0.1	0.56	0.47
ADNL	-0.14	-0.2	-0.68	1	-0.22	-0.07	-0.66	0.55	0.09	-0.5	-0.48	-0.09	0.46	-0.23	-0.55	-0.25	-0.59	-0.3	-0.44	-0.23	-0.19	-0.2	-0.15	-0.21	-0.36	-0.56	-0.44	-0.25	-0.11	0.36	-0.37	-0.1	0.12	-0.12	-0.63	-0.51
NPMS	0.2	0.34	0.41	-0.22	1	0.51	0.22	0.31	0.77	0.22	0.18	-0.24	-0.1	0.8	0.35	0.37	0.43	0.08	0.38	0.18	0.1	0.07	-0.05	-0.08	0.09	0.33	0.2	0.44	0.36	-0.24	0.32	0.4	0.14	-0.14	0.48	0.35
PLMS	0.03	0.5	0.44	-0.07	0.51	1	0.51	0.66	0.55	0.58	0.53	-0.17	0.18	0.69	0.42	0.28	0.15	0.07	0.09	0.03	-0.02	-0.01	-0.05	-0.04	0.25	0.43	0.33	0.09	0.24	0.13	0.38	0.47	0.01	-0.01	0.23	0.38
PWMS	-0.07	0.41	0.67	-0.66	0.22	0.51	1	-0.18	0.11	0.8	0.74	0.06	-0.11	0.5	0.6	0.4	0.43	0.13	0.23	0.19	0.27	0.31	0.26	0.26	0.63	0.71	0.54	0.31	0.32	-0.2	0.65	0.49	-0.34	0.34	0.48	0.54
RBLWPMS	0.03	0.29	-0.11	0.55	0.31	0.66	-0.18	1	0.52	-0.02	-0.02	-0.45	0.44	0.3	-0.1	0.11	-0.23	-0.05	-0.2	-0.04	-0.14	-0.15	-0.19	-0.2	-0.12	-0.14	-0.14	-0.06	0.06	0.3	-0.03	0.15	0.2	-0.2	-0.21	-0.09
NSMS	0.1	0.22	0.1	0.09	0.77	0.55	0.11	0.52	1	0.24	0.09	-0.22	0.44	0.82	0.25	0.29	0.29	-0.09	0.1	0.13	0.12	0.16	0.02	0.01	0.16	0.15	-0.08	0.38	0.54	0.25	0.42	0.54	0.23	-0.23	0.33	0.23
SLMS	-0.11	0.27	0.44	-0.5	0.22	0.58	0.8	-0.02	0.24	1	0.88	0.19	0.06	0.58	0.71	0.15	0.45	0.05	0.28	0.02	0.17	0.25	0.22	0.19	0.57	0.7	0.51	0.16	0.31	0.11	0.65	0.59	-0.29	0.29	0.44	0.71
SWMS	-0.31	0.37	0.5	-0.48	0.18	0.53	0.74	-0.02	0.09	0.88	1	-0.06	-0.09	0.48	0.76	0.26	0.32	-0.01	0.09	0.17	0.08	0.14	0.09	0.07	0.48	0.68	0.42	0.07	0.18	0.03	0.53	0.42	-0.4	0.4	0.36	0.71
RBLWSMS	0.12	-0.57	-0.27	-0.09	-0.24	-0.17	0.06	-0.45	-0.22	0.19	-0.06	1	-0.01	-0.09	-0.17	-0.47	0.01	-0.11	0.18	-0.27	0.04	0.07	0.25	0.18	0.13	0	0.17	-0.03	0.04	0.18	0.07	0.33	-0.1	0.1	-0.08	-0.05
NSPMS	-0.19	-0.27	-0.45	0.46	-0.1	0.18	-0.11	0.44	0.44	0.06	-0.09	-0.01	1	0.18	-0.21	-0.07	-0.1	-0.37	-0.34	0.02	0.25	0.34	0.36	0.33	0.17	-0.36	-0.49	0.19	0.48	0.69	0.18	0.3	-0.07	0.07	-0.15	-0.26
WSMS	-0.05	0.37	0.44	-0.23	0.8	0.69	0.5	0.3	0.82	0.58	0.48	-0.09	0.18	1	0.54	0.38	0.47	-0.02	0.22	0.16	0.17	0.2	0.1	0.05	0.37	0.51	0.3	0.4	0.52	0.06	0.66	0.67	0	0	0.51	0.48
TSWMS	-0.21	0.39	0.61	-0.55	0.35	0.42	0.6	-0.1	0.25	0.71	0.76	-0.17	-0.21	0.54	1	0.52	0.63	0.02	0.32	0.36	0.19	0.12	0.07	0.01	0.4	0.67	0.36	0.22	0.24	-0.26	0.54	0.28	-0.23	0.23	0.69	0.92
NPB	-0.19	0.41	0.49	-0.25	0.37	0.28	0.4	0.11	0.29	0.15	0.26	-0.47	-0.07	0.38	0.52	1	0.47	-0.3	-0.14	0.83	0.54	0.44	0.25	0.13	0.53	0.34	-0.1	0.6	0.47	-0.5	0.54	0.22	-0.4	0.4	0.57	0.34
SLPB	-0.1	0.1	0.42	-0.59	0.43	0.15	0.43	-0.23	0.29	0.45	0.32	0.01	-0.1	0.47	0.63	0.47	1	-0.2	0.49	0.42	0.52	0.45	0.44	0.26	0.5	0.29	0.09	0.6	0.44	-0.45	0.54	0.22	-0.25	0.25	0.97	0.48
ADBPB	0.61	0.37	0.43	-0.3	0.08	0.07	0.13	-0.05	-0.09	0.05	-0.01	-0.11	-0.37	-0.02	0.02	-0.3	-0.2	1	0.48	-0.58	-0.57	-0.53	-0.54	-0.26	-0.43	0.34	0.72	-0.46	-0.5	-0.04	-0.25	-0.26	0.5	-0.5	-0.17	0.17
ALPB	0.51	0	0.32	-0.44	0.38	0.09	0.23	-0.2	0.1	0.28	0.09	0.18	-0.34	0.22	0.32	-0.14	0.49	0.48	1	-0.25	-0.09	-0.1	-0.05	0.09	-0.1	0.32	0.61	0.05	-0.05	-0.4	-0.01	-0.04	0.28	-0.28	0.43	0.46
PBL	-0.39	-0.05	0.15	-0.23	0.18	0.03	0.19	-0.04	0.13	0.02	0.17	-0.27	0.02	0.16	0.36	0.83	0.42	-0.58	-0.25	1	0.67	0.57	0.44	0.3	0.52	0.07	-0.42	0.66	0.53	-0.36	0.45	0.2	-0.49	0.49	0.49	0.22
NPPB	-0.39	-0.27	-0.01	-0.19	0.1	-0.02	0.27	-0.14	0.12	0.17	0.08	0.04	0.25	0.17	0.19	0.54	0.52	-0.57	-0.09	0.67	1	0.95	0.92	0.72	0.82	-0.08	-0.34	0.91	0.81	-0.21	0.65	0.42	-0.7	0.7	0.47	0.07
NSPB	-0.36	-0.25	-0.03	-0.2	0.07	-0.01	0.31	-0.15	0.16	0.25	0.14	0.07	0.34	0.2	0.12	0.44	0.45	-0.53	-0.1	0.57	0.95	1	0.92	0.82	0.84	-0.1	-0.32	0.86	0.87	-0.03	0.67	0.49	-0.69	0.69	0.4	0.01
NPPPB	-0.45	-0.41	-0.15	-0.15	-0.05	-0.05	0.26	-0.19	0.02	0.22	0.09	0.25	0.36	0.1	0.07	0.25	0.44	-0.54	-0.05	0.44	0.92	0.92	1	0.79	0.77	-0.22	-0.32	0.79	0.77	-0.03	0.57	0.42	-0.69	0.69	0.35	-0.02
NSPPB	-0.22	-0.29	0.02	-0.21	-0.08	-0.04	0.26	-0.2	0.01	0.19	0.07	0.18	0.33	0.05	0.01	0.13	0.26	-0.26	0.09	0.3	0.72	0.82	0.79	1	0.61	-0.24	-0.18	0.58	0.72	0.1	0.46	0.31	-0.53	0.53	0.24	-0.07
SWPB	-0.37	0	0.22	-0.36	0.09	0.25	0.63	-0.12	0.16	0.57	0.48	0.13	0.17	0.37	0.4	0.53	0.5	-0.43	-0.1	0.52	0.82	0.84	0.77	0.61	1	0.28	-0.02	0.73	0.77	-0.08	0.9	0.68	-0.75	0.75	0.49	0.3
TSWPB	0.25	0.41	0.61	-0.56	0.33	0.43	0.71	-0.14	0.15	0.7	0.68	0	-0.36	0.51	0.67	0.34	0.29	0.34	0.32	0.07	-0.08	-0.1	-0.22	-0.24	0.28	1	0.74	0	-0.02	-0.26	0.43	0.34	-0.02	0.02	0.33	0.74
WSPPB	0.44	0.39	0.58	-0.44	0.2	0.33	0.54	-0.14	-0.08	0.51	0.42	0.17	-0.49	0.3	0.36	-0.1	0.09	0.72	0.61	-0.42	-0.34	-0.32	-0.32	-0.18	-0.02	0.74	1	-0.26	-0.29	-0.25	0.15	0.14	0.17	-0.17	0.09	0.5
TNP	-0.25	-0.15	0.1	-0.25	0.44	0.09	0.31	-0.06	0.38	0.16	0.07	-0.03	0.19	0.4	0.22	0.6	0.6	-0.46	0.05	0.66	0.91	0.86	0.79	0.58	0.73	0	-0.26	1	0.83	-0.3	0.66	0.53	-0.55	0.55	0.57	0.13
TNS	-0.3	-0.15	0.01	-0.11	0.36	0.24	0.32	0.06	0.54	0.31	0.18	0.04	0.48	0.52	0.24	0.47	0.44	-0.5	-0.05	0.53	0.81	0.87	0.77	0.72	0.77	-0.02	-0.29	0.83	1	0.12	0.76	0.71	-0.5	0.5	0.43	0.16
TNSPP	-0.15	-0.23	-0.45	0.36	-0.24	0.13	-0.2	0.3	0.25	0.11	0.03	0.18	0.69	0.06	-0.26	-0.5	-0.45	-0.04	-0.4	-0.36	-0.21	-0.03	-0.03	0.1	-0.08	-0.26	-0.25	-0.3	0.12	1	-0.01	0.25	0.16	-0.16	-0.47	-0.24
TW	-0.33	0.15	0.35	-0.37	0.32	0.38	0.65	-0.03	0.42	0.65	0.53	0.07	0.18	0.66	0.54	0.54	0.54	-0.25	-0.01	0.45	0.65	0.67	0.57	0.46	0.9	0.43	0.15	0.66	0.76	-0.01	1	0.8	-0.53	0.53	0.55	0.45
SWBLR	-0.17	-0.01	0.09	-0.1	0.4	0.47	0.49	0.15	0.54	0.59	0.42	0.33	0.3	0.67	0.28	0.22	0.22	-0.26	-0.04	0.2	0.42	0.49	0.42	0.31	0.68	0.34	0.14	0.53	0.71	0.25	0.8	1	-0.38	0.38	0.22	0.32
PSMS	0.53	0.08	-0.1	0.12	0.14	0.01	-0.34	0.2	0.23	-0.29	-0.4	-0.1	-0.07	0	-0.23	-0.4	-0.25	0.5	0.28	-0.49	-0.7	-0.69	-0.69	-0.53	-0.75	-0.02	0.17	-0.55	-0.5	0.16	-0.53	-0.38	1	-1	-0.24	-0.1
PSPB	-0.53	-0.08	0.1	-0.12	-0.14	-0.01	0.34	-0.2	-0.23	0.29	0.4	0.1	0.07	0	0.23	0.4	0.25	-0.5	-0.28	0.49	0.7	0.69	0.69	0.53	0.75	0.02	-0.17	0.55	0.5	-0.16	0.53	0.38	-1	1	0.24	0.1
TBL	-0.09	0.25	0.56	-0.63	0.48	0.23	0.48	-0.21	0.33	0.44	0.36	-0.08	-0.15	0.51	0.69	0.57	0.97	-0.17	0.43	0.49	0.47	0.4	0.35	0.24	0.49	0.33	0.09	0.57	0.43	-0.47	0.55	0.22	-0.24	0.24	1	0.51
TTSW	-0.01	0.24	0.47	-0.51	0.35	0.38	0.54	-0.09	0.23	0.71	0.71	-0.05	-0.26	0.48	0.92	0.34	0.48	0.17	0.46	0.22	0.07	0.01	-0.02	-0.07	0.3	0.74	0.5	0.13	0.16	-0.24	0.45	0.32	-0.1	0.1	0.51	1
	Note: Variables with correlation above 0.85 were considered redundant and thus, one of them was excluded for multivaiate analysis
